# Supplementary material for: Transcriptional profiling of matched patient biopsies clarifies molecular determinants of enzalutamide-induced lineage plasticity
Source: PubMed Central journal article supplement (PMC9477876; doi:10.1038/s41467-022-32701-6), 2022-09-15
Supplement: 41467_2022_32701_MOESM1_ESM.pdf [file 41467_2022_32701_MOESM1_ESM.pdf]

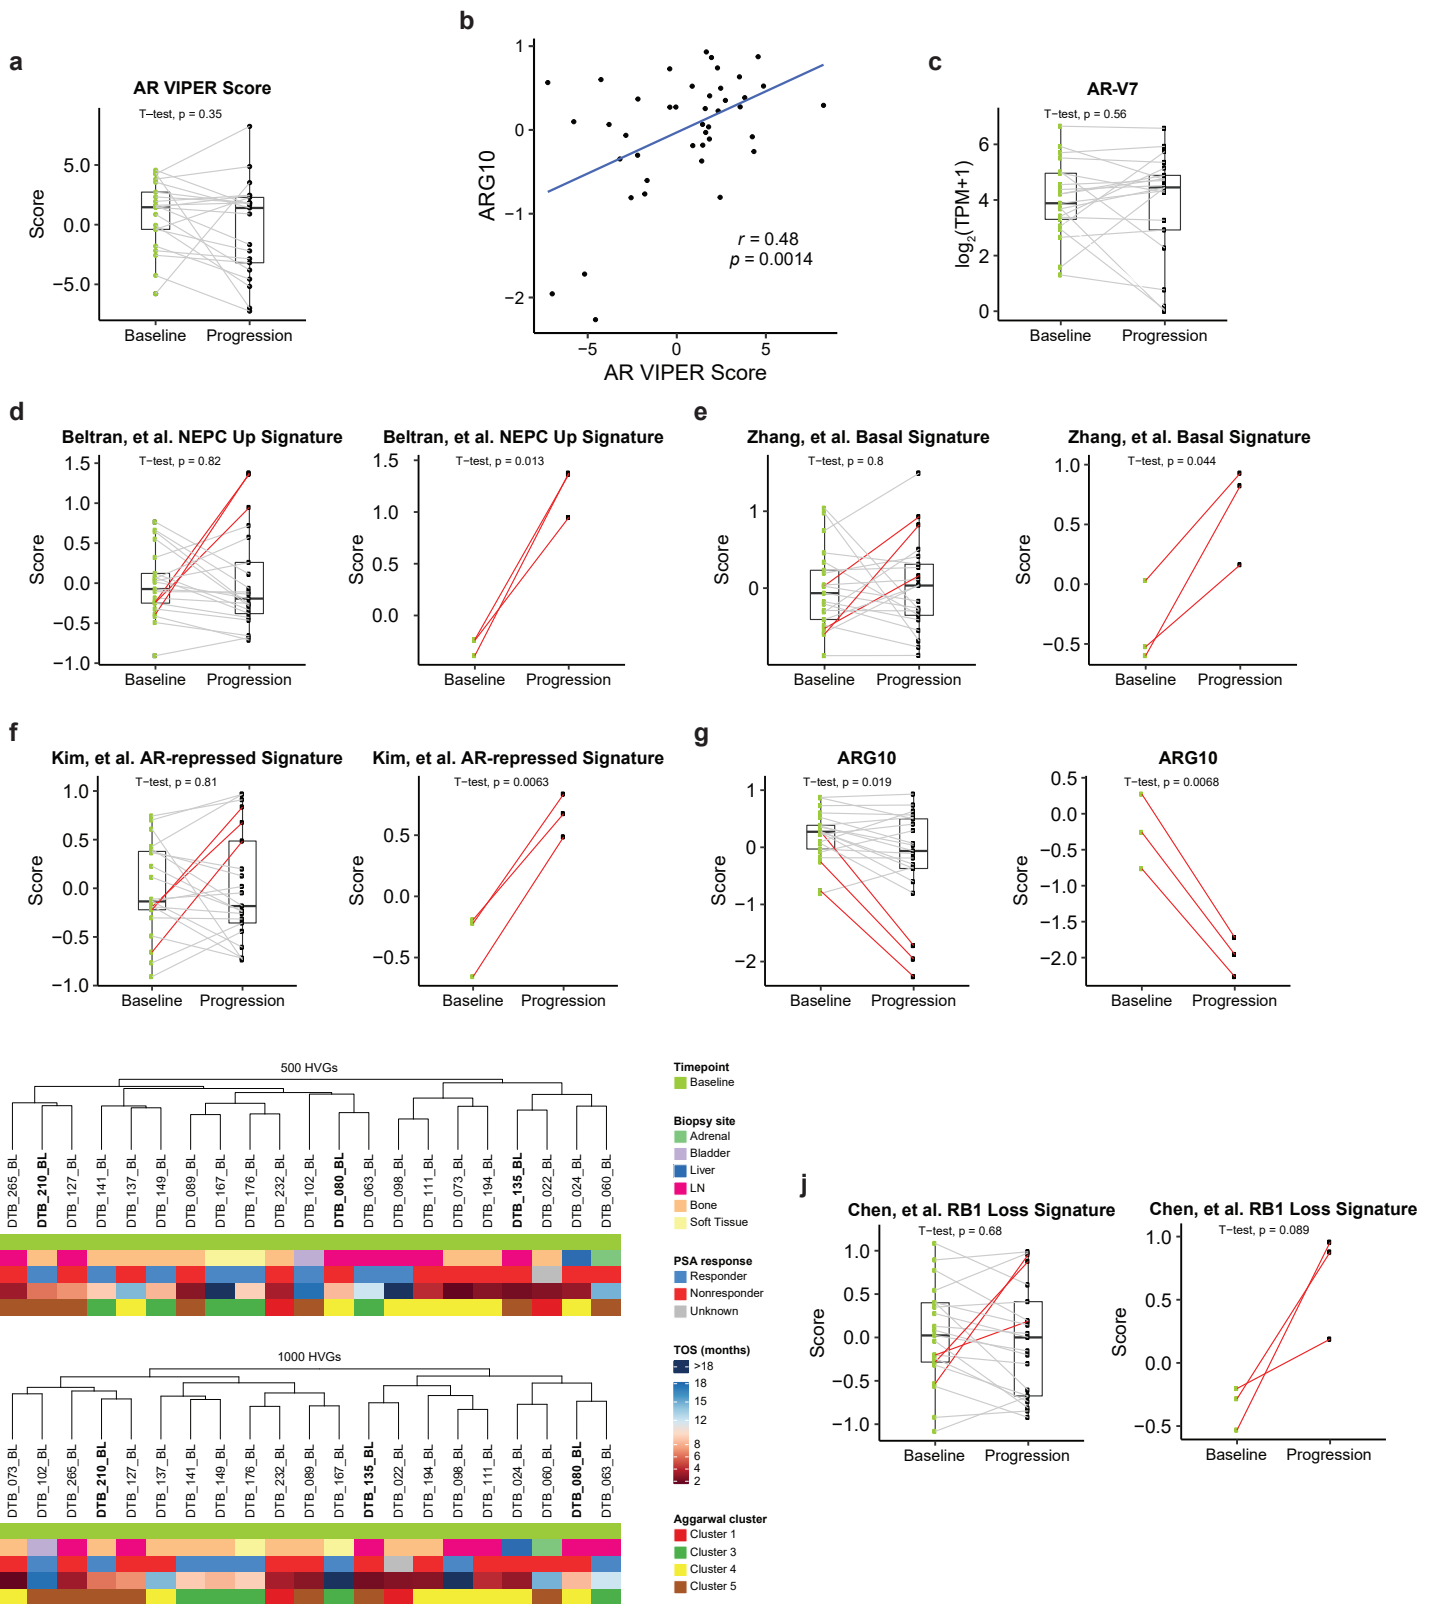

**Supplementary Figure 1: a** AR VIPER Score for each baseline and progression sample. **b** ARG10 and VIPER AR score are strongly correlated.  $p$ -value shown was determined using a two-tailed Pearson correlation. **c** AR-V7 splice variant expression for each baseline and progression sample. **d-g** Signature scores were calculated for baseline and progression samples using Beltran, et al. NEPC upregulated genes<sup>5</sup> in **d**, Zhang, et al. basal genes<sup>4</sup> in **e**, Kim, et al. AR-repressed lineage plasticity genes<sup>7</sup> in **f**, and ARG10 genes<sup>6</sup> in **g**. Red lines link converter baseline and progression samples. All 42 baseline and progression samples were used in **a-g**. **h** Unsupervised hierarchical clustering of all baseline samples ( $n=21$ ) using top 500 differentially expressed genes. **i** Unsupervised hierarchical clustering of all baseline samples ( $n=21$ ) using top 1000 differentially expressed genes. **j** Signature scores were calculated for baseline and progression samples ( $n=42$ ) using genes upregulated with RB1 loss described by Chen, et al.<sup>8</sup> For all boxplots, the center line represents the median; the box represents the interquartile range (IQR; the range between the 25th and 75th percentile); and the whiskers represent  $1.58 \times \text{IQR}$ . For **a**, **c-g**, and **j**,  $p$ -value shown was determined using a two-tailed paired Student's  $t$ -test. Source data are provided as a Source Data file.

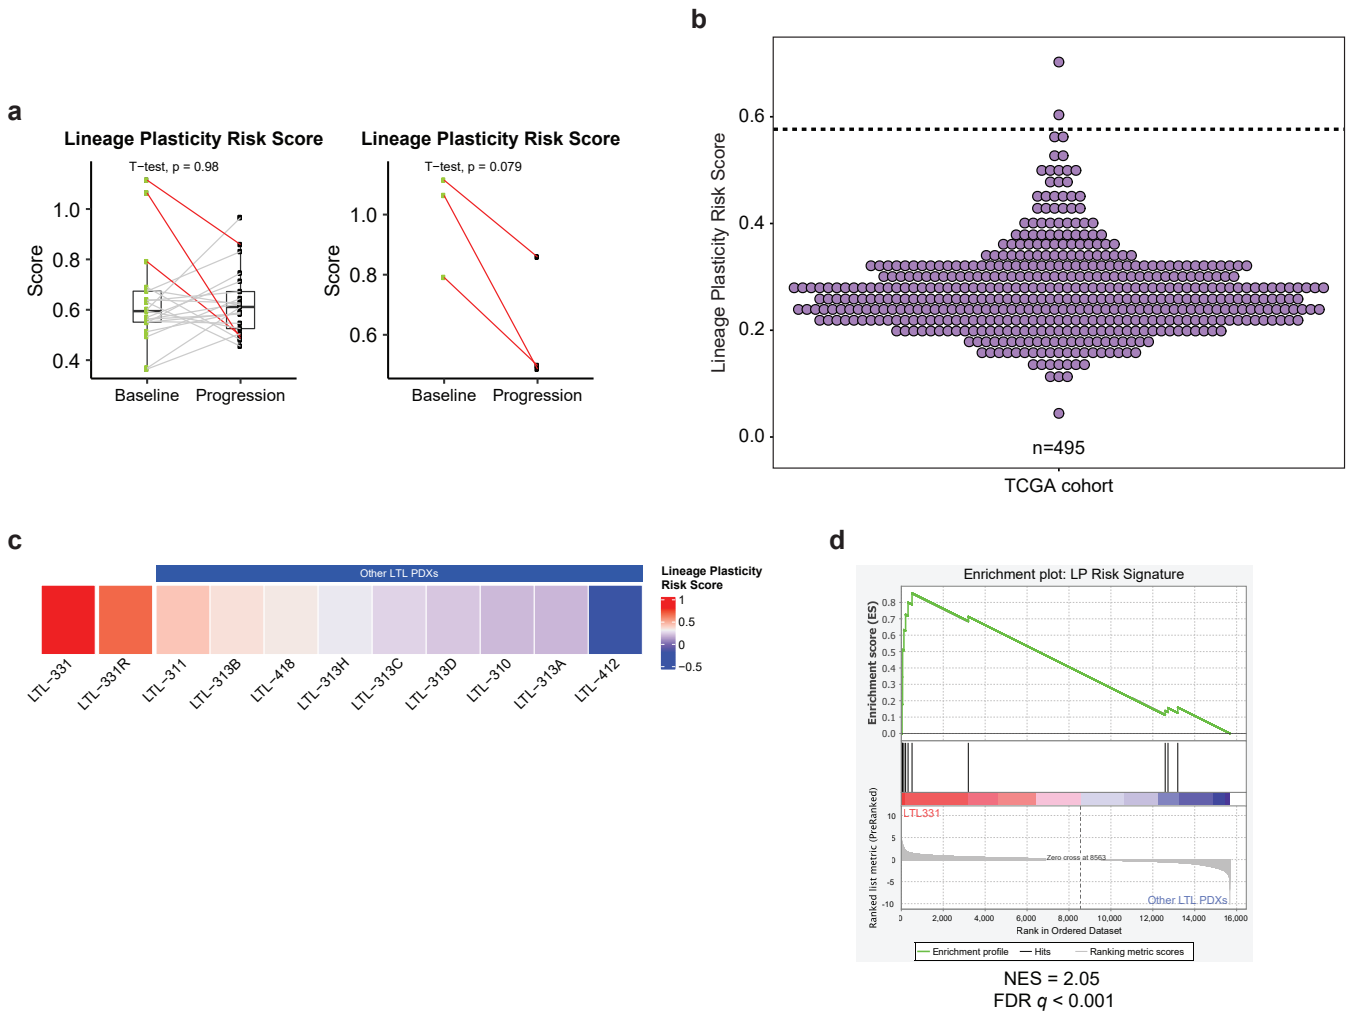

**Supplementary Figure 2:** **a** Lineage plasticity risk scores were calculated for baseline vs. progression samples ( $n=42$ ). Red lines link converter baseline and progression samples. For the boxplot, the center line represents the median; the box represents the interquartile range (IQR; the range between the 25th and 75th percentile); and the whiskers represent  $1.58 \times$  IQR.  $p$ -value shown was determined using a two-tailed paired Student's  $t$ -test. **b** Dotplot showing lineage plasticity risk signature score for patients described in prostate cancer TCGA<sup>15</sup>. **c** Heatmap showing lineage plasticity risk score in LTL331, other hormone-naïve LTL PDXs, and LTL331R described by Lin, et al.<sup>11</sup> **d** Gene set enrichment plot for 14 gene lineage plasticity risk signature in LTL331 vs. other nine hormone-naïve LTL PDXs described in Lin, et al.<sup>11</sup> Source data are provided as a Source Data file.

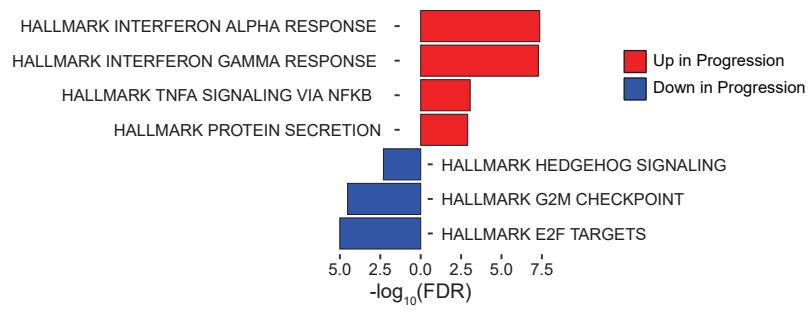

**Supplementary Figure 3:** Hallmark pathway analysis demonstrating the top up- or downregulated pathways in progression vs. baseline samples for the 18 patients whose tumors did not convert. Source data are provided as a Source Data file.

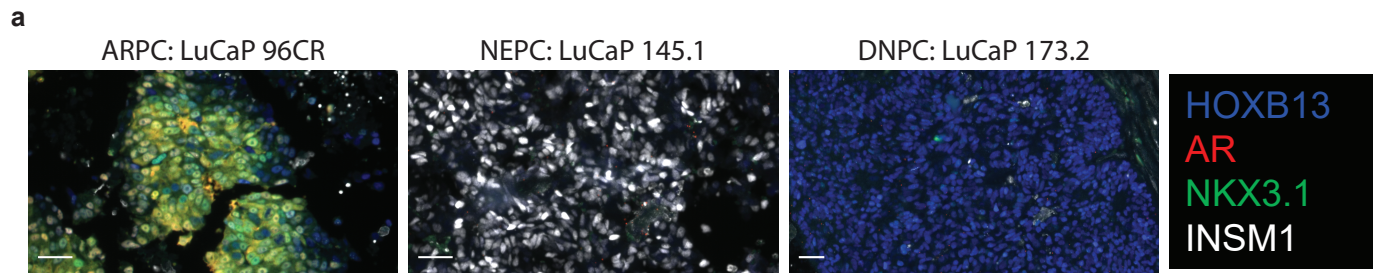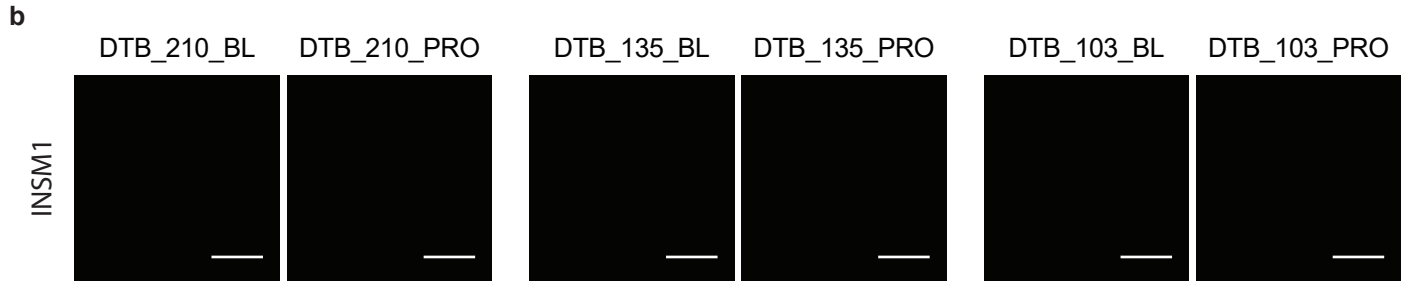

**Supplementary Figure 4: a** Panels show expression of AR, NKX3.1, INSM1, and HOXB13 in ARPC LuCaP 96CR PDX tumor, NEPC LuCaP 145.1 PDX tumor, and DNPC LuCaP 173.2 PDX tumor. AR and NKX3.1 were only expressed in LuCaP 96CR. INSM1 was only expressed in LuCaP 145.1, while HOXB13 was expressed in both LuCaP 96CR and LuCaP 173.2. Scale bars represent 50 $\mu$ m. **b** Absent INSM1 expression in all three matched converter samples examined. Scale bars represent 50 $\mu$ m. For **a-b**, single replicates were performed for all samples.

**Supplementary Table 1: Patient demographics and clinical information summary**

|                                                 |               |
|-------------------------------------------------|---------------|
| Patients                                        | n=21          |
| Median age at time of enrollment (range)        | 71 (58-88)    |
| Gleason score at diagnosis                      |               |
| ≥8                                              | 16            |
| <8                                              | 5             |
| ECOG performance status                         |               |
| 0                                               | 10            |
| 1                                               | 11            |
| Metastatic site biopsied baseline (progression) |               |
| Bone                                            | 9 (9)         |
| Lymph node                                      | 7 (8)         |
| Pelvic soft tissue                              | 2 (1)         |
| Bladder wall                                    | 1 (0)         |
| Liver                                           | 1 (2)         |
| Adrenal                                         | 1 (1)         |
| Same lesion biopsied                            | 8             |
| Visceral metastatic disease at time of biopsy   | 5             |
| Prior treatment                                 |               |
| Abiraterone                                     | 7             |
| ADT                                             | 21            |
| Bicalutamide                                    | 8             |
| Cabazitaxel                                     | 1             |
| Docetaxel                                       | 3             |
| Sip-T                                           | 1             |
| Median PSA at enrollment (range)                | 57 (3.6-1210) |
| 50% PSA response to enzalutamide                | 7             |
| Median time on enzalutamide, days (SD)          | 226 (207)     |

**Supplementary Table 2: Patient and biopsy information**

| <u>Sample ID</u> | <u>Baseline biopsy tissue</u> | <u>Progression biopsy tissue</u> | <u>Same site biopsied</u> | <u>Time Between Biopsies (days)</u> | <u>PSA at baseline (ng/mL)</u> | <u>PSA Change at 12 weeks (%)</u> | <u>Prior treatment</u>                   |
|------------------|-------------------------------|----------------------------------|---------------------------|-------------------------------------|--------------------------------|-----------------------------------|------------------------------------------|
| DTB_022          | Bone                          | Bone                             | No                        | 85                                  | 7.28                           | N/A                               | ADT, abiraterone                         |
| DTB_024          | Liver                         | Liver                            | No                        | 99                                  | 48.92                          | 75.05                             | ADT, abiraterone, docetaxel              |
| DTB_060          | Adrenal                       | Adrenal                          | Yes                       | 449                                 | 102.45                         | -20.41                            | ADT                                      |
| DTB_063          | LN                            | LN                               | No                        | 368                                 | 20.9                           | -74.64                            | ADT                                      |
| DTB_073          | Bone                          | Bone                             | No                        | 54                                  | 57.67                          | 156.81                            | ADT, abiraterone                         |
| DTB_080          | LN                            | LN                               | Yes                       | 266                                 | 14.92                          | -28.48                            | ADT                                      |
| DTB_089          | Bone                          | Liver                            | No                        | 91                                  | 14.27                          | 181.18                            | ADT, abiraterone                         |
| DTB_098          | LN                            | LN                               | Yes                       | 615                                 | 148.39                         | -83.74                            | ADT                                      |
| DTB_102          | Bladder                       | LN                               | No                        | 533                                 | 1210.48                        | -93.02                            | ADT, abiraterone, docetaxel, cabazitaxel |
| DTB_111          | LN                            | LN                               | Yes                       | 134                                 | 35.02                          | 113.99                            | ADT, abiraterone                         |
| DTB_127          | LN                            | LN                               | Yes                       | 226                                 | 228                            | 169.29                            | ADT, abiraterone                         |
| DTB_135          | LN                            | LN                               | No                        | 73                                  | 9.19                           | 164.26                            | ADT, bicalutamide                        |
| DTB_137          | Bone                          | Bone                             | No                        | 441                                 | 539.62                         | -10.85                            | ADT, bicalutamide                        |
| DTB_141          | Bone                          | Bone                             | No                        | 285                                 | 140.07                         | -81.04                            | ADT, bicalutamide                        |
| DTB_149          | Bone                          | Bone                             | No                        | 262                                 | 16.45                          | -80.29                            | ADT, bicalutamide                        |
| DTB_167          | Soft tissue                   | Bone                             | No                        | 827                                 | 136.64                         | -88.38                            | ADT, bicalutamide, sipuleucel-T          |
| DTB_176          | Soft tissue                   | Soft tissue                      | Yes                       | 291                                 | 3.57                           | -64.76                            | ADT, bicalutamide                        |
| DTB_194          | Bone                          | Bone                             | No                        | 88                                  | 103.55                         | 100.36                            | ADT, bicalutamide                        |
| DTB_210          | Bone                          | Bone                             | No                        | 200                                 | 70.45                          | -83.36                            | ADT                                      |
| DTB_232          | Bone                          | Bone                             | Yes                       | 114                                 | 5.31                           | -0.55                             | ADT, docetaxel                           |
| DTB_265          | LN                            | LN                               | Yes                       | 105                                 | 42.93                          | 5.84                              | ADT, bicalutamide                        |

**Supplementary Table 3: 14 gene Lineage Plasticity Risk Signature**

The Wald test implemented in DESeq2 R package was used to calculate p-values.

|               | <u>log2FoldChange</u> | <u>p-value</u> | <u>p-adj</u> |
|---------------|-----------------------|----------------|--------------|
| RNF43         | 3.119769769           | 3.48E-07       | 0.001120635  |
| SNRPF         | 2.552743092           | 2.82E-06       | 0.005047666  |
| TRABD2A       | 4.179997895           | 4.15E-06       | 0.006073226  |
| NDUFA12       | 2.140173456           | 5.32E-06       | 0.00659587   |
| GAS2L3        | 2.638572495           | 8.07E-06       | 0.008662214  |
| RPS24         | 1.711754964           | 1.67E-05       | 0.012808225  |
| DNA2          | 1.418005136           | 1.91E-05       | 0.014009937  |
| RP5-857K21.10 | 1.92284875            | 0.000294085    | 0.098659293  |
| POC1B         | 1.891507067           | 3.43E-05       | 0.023013467  |
| ADK           | 1.506396028           | 0.000276788    | 0.098322909  |
| ATP5B         | 1.298983588           | 0.000195146    | 0.080498034  |
| XPOT          | 1.037507837           | 0.000166796    | 0.075841951  |
| SLCO1B3       | 5.897966677           | 0.000174263    | 0.075841951  |
| RHOBTB1       | 2.882280784           | 0.000112042    | 0.05976354   |

**Supplementary Table 4: High converter risk score TP53/RB1/PTEN alterations**

| <u>Dataset</u> | <u>Sample ID</u>                 | <u>RB1</u>          | <u>TP53</u>   | <u>PTEN</u>         |
|----------------|----------------------------------|---------------------|---------------|---------------------|
| Abida          | PRAD-01115468-Tumor-SM-6B2KE     | Frameshift deletion | None          | Frameshift deletion |
| Abida          | PRAD-01115554-Tumor-SM-A56E4     | None                | Missense      | None                |
| Abida          | PRAD-6115594-0-Tumor-SM-B2XRW    | None                | None          | None                |
| Abida          | PROS01448-1115161-Tumor-SM-5SGU1 | None                | None          | None                |
| Abida          | SC-9146-T                        | None                | None          | None                |
| Abida          | MO-1337-TM                       | None                | Deep deletion | Deep deletion       |
| Alumkal        | 251                              | Not available       | Not available | Not available       |
| Alumkal        | 206                              | Not available       | Not available | Not available       |
| Alumkal        | 229                              | None                | None          | None                |



**Supplementary Table 5: DNA alterations for wider cohort**

| <u>Sample ID</u> | <u>Mutation</u>                                 | <u>Copy number gain/loss</u>                 |
|------------------|-------------------------------------------------|----------------------------------------------|
| DTB_022_BL       | Inadequate sample                               | Inadequate sample                            |
| DTB_022_Pro      | BRAF                                            | None found                                   |
| DTB_024_BL       | Inadequate sample                               | Inadequate sample                            |
| DTB_024_Pro      | PTEN                                            | None found                                   |
| DTB_060_BL       | None found                                      | None found                                   |
| DTB_060_Pro      | None found                                      | None found                                   |
| DTB_063_BL       | AKT1, HRAS, TP53                                | None found                                   |
| DTB_063_Pro      | AKT1, HRAS, TP53                                | None found                                   |
| DTB_073_BL       | TP53                                            | None found                                   |
| DTB_073_Pro      | TP53                                            | None found                                   |
| DTB_080_BL       | PTEN                                            | None found                                   |
| DTB_080_Pro      | PTEN                                            | None found                                   |
| DTB_089_BL       | None found                                      | None found                                   |
| DTB_089_Pro      | TP53                                            | None found                                   |
| DTB_098_BL       | None found                                      | None found                                   |
| DTB_098_Pro      | ATM, NTRK1                                      | ATM loss, MYC amplification                  |
| DTB_102_BL       | TP53                                            | None found                                   |
| DTB_102_Pro      | TP53, NF1                                       | TP53 loss                                    |
| DTB_103_BL       | RB1, FGFR3, NOTCH1                              | None found                                   |
| DTB_103_Pro      | RB1, FGFR3, NOTCH1                              | None found                                   |
| DTB_111_BL       | KDR, TP53                                       | CDKN2A loss                                  |
| DTB_111_Pro      | KDR, TP53                                       | CDKN2A loss                                  |
| DTB_127_BL       | TP53, TSC2                                      | RB1 loss                                     |
| DTB_127_Pro      | TP53, TSC2                                      | RB1 loss                                     |
| DTB_135_BL*      | SPEN, FAT1                                      | AR amplification, MYC amplification          |
| DTB_135_Pro*     | SPEN, FAT1, CTNNB1 (subclonal)                  | AR amplification, MYC amplification          |
| DTB_137_BL       | Inadequate sample                               | Inadequate sample                            |
| DTB_137_Pro      | NOTCH1                                          | None found                                   |
| DTB_141_BL       | NF1                                             | PTEN loss                                    |
| DTB_141_Pro      | NF1                                             | PTEN loss, TP53 loss                         |
| DTB_149_BL       | PTEN, PIK3R1, STK11                             | None found                                   |
| DTB_149_Pro      | PTEN, PIK3R1, STK11                             | TP53 loss                                    |
| DTB_167_BL       | PTEN, ERBB2                                     | FGFR1 loss                                   |
| DTB_167_Pro      | PTEN, XRCC1                                     | AR amplification                             |
| DTB_176_BL       | PTEN                                            | PTEN loss, TP53 loss                         |
| DTB_176_Pro      | Inadequate sample                               | Inadequate sample                            |
| DTB_194_BL       | None found                                      | None found                                   |
| DTB_194_Pro      | None found                                      | None found                                   |
| DTB_210_BL*      | APC, SPOP, KMT2C                                | None Found                                   |
| DTB_210_Pro*     | APC, SPOP, KMT2C                                | None Found                                   |
| DTB_232_BL       | None found                                      | None found                                   |
| DTB_232_Pro      | None found                                      | None found                                   |
| DTB_265_BL       | ARID1A, FANCC, FANCM, POLE, TP53                | AR amplification                             |
| DTB_265_Pro      | ARID1A, ERBB4, FANCC, FANCM, MAP2K2, POLE, TP53 | AR amplification, Chromosome 8 amplification |

\*Tested via cfDNA assay

## Supplementary Table 6: Gene signature composition

| <u>Beltran, et al. NEPC Up</u> | <u>Zhang, et al. Basal</u> | <u>Kim, et al. AR-repressed</u> | <u>ARG10</u> | <u>Chen, et al. Up with RB1 loss</u> |
|--------------------------------|----------------------------|---------------------------------|--------------|--------------------------------------|
| ASXL3                          | COL17A1                    | NRXN3                           | ALDH1A3      | RIBC2                                |
| AURKA                          | CSMD2                      | ALX4                            | KLK3         | SH3GL2                               |
| BRINP1                         | CDH13                      | TRAF3IP2                        | FKBP5        | IQCC                                 |
| C7orf76                        | MUM1L1                     | ATP2C2                          | KLK2         | MESP1                                |
| CAND2                          | MMP3                       | KDM4A                           | NKX3-1       | CAMK2N2                              |
| DNMT1                          | IL33                       | TGFBR3                          | TMPPRS2      | DONSON                               |
| ETV5                           | GIMAP8                     | SEMA3C                          | PLPP1        | USP1                                 |
| EZH2                           | PDPN                       | RBL1                            | PART1        | POU4F1                               |
| GNAO1                          | VSNL1                      | MET                             | PMEPA1       | LHX2                                 |
| GPX2                           | BNC1                       | CIT                             | STEAP4       | CDKN2A                               |
| JAKMIP2                        | IGFBP7                     | CHAC1                           |              | ZSCAN16                              |
| KCNB2                          | DLK2                       | CABLES1                         |              | GPR137C                              |
| KCND2                          | HMGA2                      | FLNB                            |              | H2AFV                                |
| KIAA0408                       | NOTCH4                     | DAB2IP                          |              | AKAP5                                |
| LRRC16B                        | THBS2                      | AUTS2                           |              | ELF2                                 |
| MAP10                          | TAGLN                      | DAB1                            |              | CDKAL1                               |
| MYCN                           | FHL1                       | CDC42EP4                        |              | ZNF43                                |
| NRSN1                          | ANXA8L2                    | CD55                            |              | TXNDC16                              |
| PCSK1                          | COL4A6                     | TTLL3                           |              | ZNF606                               |
| PROX1                          | KCNQ5                      | RP11-159F24.1                   |              | PCSK1                                |
| RGS7                           | WNT7A                      | MYO15B                          |              | RAD1                                 |
| SCG3                           | KCNMA1                     | BCLAF1                          |              | CCNE2                                |
| SEC11C                         | NIPAL4                     | RIMS1                           |              | STMN1                                |
| SEZ6                           | FLRT2                      | NEFL                            |              | ZNF254                               |
| SOGA3                          | LTBP2                      | GPD2                            |              | ID4                                  |
| ST8SIA3                        | FOX11                      | HPCAL4                          |              | ZSCAN18                              |
| SVOP                           | NGFR                       | SCRN1                           |              | CDKN2C                               |
| SYT11                          | SERPINB13                  | TACC2                           |              | HSD17B6                              |
| TRIM9                          | CNTNAP3B                   | APBB2                           |              | PDIK1L                               |
|                                | FGFR3                      | CDCA7L                          |              | FANCL                                |
|                                | ARHGAP25                   | GABRA5                          |              | TEX9                                 |
|                                | AEBP1                      | MGST1                           |              | COCH                                 |
|                                | FJX1                       | DPF1                            |              | PIK3R3                               |
|                                | TNC                        | RAI14                           |              | RNASEH2A                             |
|                                | MSRB3                      | PARP12                          |              | ACYP1                                |
|                                | NRG1                       | PLXNA2                          |              | UBR7                                 |
|                                | SERPINF1                   | EPB41L2                         |              | CLSPN                                |
|                                | DLC1                       | IGSF9B                          |              | BTF3L4                               |
|                                | IL1A                       | RCOR1                           |              | KCND2                                |
|                                | DKK3                       | SMAD7                           |              | TIGD7                                |
|                                | ERG                        | MAP2K6                          |              | ZNF528                               |
|                                | SYNE1                      | FHOD3                           |              | DAND5                                |
|                                | JAG2                       | BIN1                            |              | TTLL7                                |
|                                | JAM3                       | TMOD1                           |              | DCHS1                                |
|                                | MRC2                       | SMAD6                           |              | ZNF367                               |
|                                | SPARC                      | DUSP5                           |              | GLRB                                 |
|                                | C16orf74                   | HUNK                            |              | RTN3                                 |
|                                | FAT3                       | MYO10                           |              | ZNF347                               |
|                                | KIRREL                     | CXorf57                         |              | EID2B                                |
|                                | SH2D5                      | SMC6                            |              | GKAP1                                |
|                                | KRT6A                      | ARHGEF3                         |              | ZNF610                               |
|                                | KRT34                      | STRBP                           |              | UCHL1                                |
|                                | ITGA6                      | STXBP6                          |              | KIAA1841                             |
|                                | TP63                       | ROBO1                           |              | KLHL2                                |
|                                | KRT5                       | TANC2                           |              | JAKMIP1                              |
|                                | KRT14                      | FRMD3                           |              | SLC36A4                              |
|                                |                            | GOLIM4                          |              | FAM111B                              |
|                                |                            | DPP10                           |              | CPE                                  |
|                                |                            | WSCD1                           |              | NEURL1B                              |
|                                |                            | TNFAIP2                         |              | MNS1                                 |
|                                |                            | EPHA6                           |              | TCTEX1D2                             |
|                                |                            | SH3GL2                          |              | SPSB4                                |
|                                |                            | BCL2                            |              | KCTD16                               |
|                                |                            | BEND3                           |              | CAND2                                |
|                                |                            | MBP                             |              | OSCP1                                |
|                                |                            | SAMD5                           |              | DEK                                  |
|                                |                            | TMEM65                          |              | FBLN7                                |
|                                |                            | MYB                             |              | ZBTB8A                               |
|                                |                            | ASXL2                           |              |                                      |
|                                |                            | HRH2                            |              |                                      |
|                                |                            | KIAA0319                        |              |                                      |
|                                |                            | CREB5                           |              |                                      |
|                                |                            | AK5                             |              |                                      |
|                                |                            | PALM2-AKAP2                     |              |                                      |
|                                |                            | IKZF3                           |              |                                      |
|                                |                            | ARHGEF28                        |              |                                      |

## **Supplementary Methods**

### **Aggarwal, et al. cluster designation**

The unsupervised analysis from Aggarwal, et al.<sup>1</sup> identified five clusters using 119 samples. That study identified 528 genes that were the most differentially expressed between the clusters. Using that gene list, we determined the cluster assignments for new samples included in this matched biopsy cohort without replicating the unsupervised analysis. First, we addressed the sample batch effect between the samples from the previous study and those from the current study. We applied exponential normalization on the expression data of all samples—old and new. Exponential normalization is a per-sample operation that fits the expression of all genes to a unit exponential distribution. Next, we used scikit-learn's k-nearest-neighbor classifier implementation<sup>2</sup> to train a classification model using 118 exponential-normalized samples that had pre-existing cluster assignments. The model used 507 genes from the 528 gene list from Aggarwal, et al.<sup>1</sup> because several genes were not expressed in the previously uncharacterized samples used in this report. The model's accuracy in leave-one-out cross validation was 0.712. The trained model was then used to predict the cluster assignment of previously unclassified, exponential-normalized samples.

### **Labrecque, et al. classification**

To determine the Labrecque classification, we applied a 26 gene signature used previously to define five phenotypic categories of CRPC<sup>3</sup>: AR-high prostate cancer (ARPC), amphicrine prostate cancer, AR-low prostate cancer (ARLPC), double-negative prostate cancer (DNPC), and neuroendocrine prostate cancer (NEPC)<sup>3</sup>. One gene (TARP) was missing from the dataset and was not included. Samples were assigned to the phenotype groups by clustering using Euclidean distance calculated by the dist function and visualization using classical

multidimensional scaling (MDS) calculated with the `cmdscale` function in R using the  $\log_2(\text{TPM} + 1)$  transformed expression profiles of the remaining 25 genes.

### **Single-sample gene signature scores**

In this study, we used several gene signatures collected from public resources, including the Zhang Basal gene signature<sup>4</sup>; the Beltran, et al. NEPC Up gene signature<sup>5</sup>; the ARG10 signature<sup>6</sup>; the Kim, et al. 76 gene AR-repressed signature<sup>7</sup>; and the Chen, et al. RB1 loss signature<sup>8</sup>. The signature genes are listed in Supplementary Table 6. TPM gene expression values were  $\log_2(\text{TPM} + 1)$  transformed and converted to z-scores by:  $z = (x - \mu)/\sigma$ , where  $\mu$  is the average  $\log_2(\text{TPM} + 1)$  across all samples of a gene and  $\sigma$  is the standard deviation of the  $\log_2(\text{TPM} + 1)$  across all samples of a gene. The signature score of each sample was the average z-score of all genes in each signature. p-values were determined using a two-tailed paired Student's t-test.

### **Development of a lineage plasticity risk gene signature**

To derive the lineage plasticity risk signature, differential gene expression analysis was performed using DESeq2 as described above by comparing baseline converter vs. non-converter samples. Genes upregulated in converter samples with adjusted p-value < 0.1 were included. Single-sample lineage plasticity risk signature was derived using the single-sample gene set enrichment analysis (ssGSEA)<sup>9</sup> implemented in the GSVA<sup>10</sup> R package.

### **Assessment of the lineage plasticity signature in patient-derived xenograft models**

We examined baseline gene expression from 11 human prostate PDX models<sup>11</sup>. We compared the lineage plasticity signature scores of the one tumor (LTL331) that undergoes castration-induced lineage plasticity to other hormone-naïve PDXs that do not: LTL310, LTL311, LTL412, LTL418, LTL313A, LTL313B, LTL313C, LTL313D, LTL313H and the

castration-resistant LTL331R PDX. The single-sample lineage convert signature score was derived using the single-sample gene set enrichment analysis (ssGSEA)<sup>9</sup> implemented in the GSVA<sup>10</sup> R package. The fold-change-based gene ranking from the comparison excluding LTL331R was used to assess the enrichment of the lineage plasticity risk signature using gene set enrichment analysis<sup>12</sup>.

### **Survival analysis**

We evaluated the correlation of the lineage plasticity risk signature with survival time in two independent datasets. First, after excluding patients that overlapped with this current study, we identified 17 patients whose tumors had undergone RNA-seq from our prior prospective enza clinical trial with overall survival information<sup>13</sup>. Second, we identified samples from the International Dream Team dataset for which overall survival from first line ARSI treatment was available; we restricted the patients to those without prior exposure to abiraterone, enza, or docetaxel<sup>14</sup>. Then, we merged the gene expression of the three datasets, including the samples in the matched biopsy cohort, into one matrix to calculate the enrichment score of each sample consistently. Single-sample lineage plasticity risk score was derived using the single-sample gene set enrichment analysis (ssGSEA)<sup>9</sup> implemented in the GSVA<sup>10</sup> R package. We then defined a signature cutoff to separate the baseline converter samples from the non-converter samples from the matched biopsy cohort with the maximum margin as calculated by taking the average of the lowest score in the non-convert group and highest score in the converter group. Finally, we used this cutoff to stratify samples in the two independent datasets into two groups with high and low lineage plasticity signature risk scores. The comparison of the survival pattern between the two groups was performed by the Kaplan-Meier method using the Mantel-Cox log-rank test. Separately, we applied the same cutoff defined above to stratify samples from the prostate cancer Cancer Genome Atlas<sup>15</sup>.

### **SU2C sample relabeling**

For several samples, SU2C IDs were relabeled as baseline or progression based upon when the patient was exposed to enzalutamide. DTB\_022\_PRO and DTB\_024\_PRO were relabeled DTB\_022\_BL and DTB\_024\_BL, respectively, as those biopsies were performed immediately prior to starting enzalutamide treatment. Correspondingly, DTB\_022\_PRO2 and DTB\_024\_PRO2 were relabeled DTB\_022\_PRO and DTB\_024\_PRO as those biopsies were performed at progression on enzalutamide. DTB\_098\_PRO2 was relabeled DTB\_098\_PRO as patient continued enzalutamide until after PRO2 biopsy.

## Supplementary References

1. Aggarwal, R., *et al.* Clinical and Genomic Characterization of Treatment-Emergent Small-Cell Neuroendocrine Prostate Cancer: A Multi-institutional Prospective Study. *J Clin Oncol* **36**, 2492-2503 (2018).
2. Pedregosa, F., *et al.* Scikit-learn: Machine Learning in Python. *J Mach Learn Res* **12**, 2825-2830 (2011).
3. Labrecque, M.P., *et al.* Molecular profiling stratifies diverse phenotypes of treatment-refractory metastatic castration-resistant prostate cancer. *J Clin Invest* **129**, 4492-4505 (2019).
4. Zhang, D., *et al.* Stem cell and neurogenic gene-expression profiles link prostate basal cells to aggressive prostate cancer. *Nat Commun* **7**, 10798 (2016).
5. Beltran, H., *et al.* Divergent clonal evolution of castration-resistant neuroendocrine prostate cancer. *Nat Med* **22**, 298-305 (2016).
6. Nyquist, M.D., *et al.* Combined TP53 and RB1 Loss Promotes Prostate Cancer Resistance to a Spectrum of Therapeutics and Confers Vulnerability to Replication Stress. *Cell Rep* **31**, 107669 (2020).
7. Kim, D.H., *et al.* BET Bromodomain Inhibition Blocks an AR-Repressed, E2F1-Activated Treatment-Emergent Neuroendocrine Prostate Cancer Lineage Plasticity Program. *Clin Cancer Res* **27**, 4923-4936 (2021).
8. Chen, W.S., *et al.* Genomic Drivers of Poor Prognosis and Enzalutamide Resistance in Metastatic Castration-resistant Prostate Cancer. *Eur Urol* **76**, 562-571 (2019).
9. Barbie, D.A., *et al.* Systematic RNA interference reveals that oncogenic KRAS-driven cancers require TBK1. *Nature* **462**, 108-112 (2009).
10. Hanzelmann, S., Castelo, R. & Guinney, J. GSVA: gene set variation analysis for microarray and RNA-seq data. *BMC Bioinformatics* **14**, 7 (2013).
11. Lin, D., *et al.* High fidelity patient-derived xenografts for accelerating prostate cancer discovery and drug development. *Cancer Res* **74**, 1272-1283 (2014).
12. Subramanian, A., *et al.* Gene set enrichment analysis: a knowledge-based approach for interpreting genome-wide expression profiles. *Proc Natl Acad Sci U S A* **102**, 15545-15550 (2005).
13. Alumkal, J.J., *et al.* Transcriptional profiling identifies an androgen receptor activity-low, stemness program associated with enzalutamide resistance. *Proc Natl Acad Sci U S A* **117**, 12315-12323 (2020).
14. Abida, W., *et al.* Genomic correlates of clinical outcome in advanced prostate cancer. *Proc Natl Acad Sci U S A* **116**, 11428-11436 (2019).
15. Cancer Genome Atlas Research Network. The Molecular Taxonomy of Primary Prostate Cancer. *Cell* **163**, 1011-1025 (2015).
